# Supplementary material for: The mechanism of delayed release in earthquake-induced avalanches
Source: Proc Math Phys Eng Sci. 2019 Jul 24;475(2227):20190092. doi: 10.1098/rspa.2019.0092 (PMC6694300; doi:10.1098/rspa.2019.0092)
Supplement: Data in Fig1B [file rspa20190092supp2.xlsx]

## Sheet: raw_data
Number of Testimonies			Date & Time UTC	Latitude degrees		Longitude degrees		Depth km	Mag [+]	Region name
411		V	2017-01-18 09:25:40.6	42.55	N	13.26	E	9	5.3	CENTRAL ITALY
		F	2017-01-18 09:31:05.8	42.58	N	13.27	E	9	2.6	CENTRAL ITALY
			2017-01-18 09:34:44.4	42.57	N	13.28	E	11	2.5	CENTRAL ITALY
		F	2017-01-18 09:52:11.8	42.91	N	13.13	E	8	3.2	CENTRAL ITALY
			2017-01-18 09:56:34.9	42.60	N	13.27	E	15	2.5	CENTRAL ITALY
			2017-01-18 10:05:42.9	42.61	N	13.26	E	11	2.7	CENTRAL ITALY
			2017-01-18 10:07:49.1	42.58	N	13.31	E	12	2.9	CENTRAL ITALY
		F	2017-01-18 10:09:01.7	42.54	N	13.26	E	11	2.5	CENTRAL ITALY
			2017-01-18 10:11:57.3	42.58	N	13.25	E	11	2.7	CENTRAL ITALY
285	1	V	2017-01-18 10:14:10.8	42.53	N	13.28	E	9	5.7	CENTRAL ITALY
		F	2017-01-18 10:15:33.2	42.53	N	13.29	E	10	4.7	CENTRAL ITALY
		F	2017-01-18 10:16:39.5	42.55	N	13.28	E	11	4.6	CENTRAL ITALY
			2017-01-18 10:19:21.2	42.53	N	13.28	E	11	3.2	CENTRAL ITALY
		F	2017-01-18 10:21:00.8	42.58	N	13.29	E	8	3.1	CENTRAL ITALY
			2017-01-18 10:22:30.8	42.52	N	13.30	E	12	3.2	CENTRAL ITALY
		F	2017-01-18 10:24:16.3	42.60	N	13.17	E	10	4.5	CENTRAL ITALY
140		VI	2017-01-18 10:25:25.0	42.49	N	13.31	E	9	5.6	CENTRAL ITALY
		F	2017-01-18 10:30:33.3	42.53	N	13.27	E	10	3.8	CENTRAL ITALY
		F	2017-01-18 10:34:09.7	42.57	N	13.26	E	10	3.2	CENTRAL ITALY
			2017-01-18 10:37:46.1	42.51	N	13.27	E	13	3.7	CENTRAL ITALY
		F	2017-01-18 10:39:24.5	42.54	N	13.29	E	11	4.1	CENTRAL ITALY
		F	2017-01-18 10:41:42.5	42.48	N	13.28	E	10	3.7	CENTRAL ITALY
			2017-01-18 10:43:47.5	42.50	N	13.29	E	10	3	CENTRAL ITALY
			2017-01-18 10:46:33.4	42.52	N	13.27	E	14	2.9	CENTRAL ITALY
		F	2017-01-18 10:51:16.2	42.49	N	13.28	E	11	3.5	CENTRAL ITALY
			2017-01-18 10:53:47.4	42.50	N	13.28	E	9	3	CENTRAL ITALY
		F	2017-01-18 11:00:53.7	42.52	N	13.36	E	11	3.5	CENTRAL ITALY
		F	2017-01-18 11:04:43.3	42.53	N	13.27	E	12	3.4	CENTRAL ITALY
18		V	2017-01-18 11:07:37.9	42.62	N	13.24	E	10	4.7	CENTRAL ITALY
			2017-01-18 11:11:30.8	42.58	N	13.25	E	11	2.6	CENTRAL ITALY
		F	2017-01-18 11:13:33.0	42.50	N	13.31	E	11	2.8	CENTRAL ITALY
			2017-01-18 11:16:26.8	42.50	N	13.29	E	11	2.5	CENTRAL ITALY
		F	2017-01-18 11:19:30.3	42.56	N	13.26	E	11	2.5	CENTRAL ITALY
			2017-01-18 11:21:27.1	42.60	N	13.06	E	5	2.6	CENTRAL ITALY
			2017-01-18 11:22:46.4	42.51	N	13.32	E	12	2.9	CENTRAL ITALY
			2017-01-18 11:26:57.0	42.53	N	13.29	E	11	2.6	CENTRAL ITALY
			2017-01-18 11:30:19.0	42.55	N	13.23	E	4	2.6	CENTRAL ITALY
			2017-01-18 11:34:12.7	42.58	N	13.26	E	13	2.8	CENTRAL ITALY
			2017-01-18 11:39:44.9	42.56	N	13.26	E	13	2.7	CENTRAL ITALY
		F	2017-01-18 11:51:05.0	42.55	N	13.31	E	10	2.6	CENTRAL ITALY
			2017-01-18 11:56:58.8	42.53	N	13.28	E	14	2.9	CENTRAL ITALY
		F	2017-01-18 12:01:17.4	42.54	N	13.27	E	14	4.1	CENTRAL ITALY
			2017-01-18 12:03:36.4	42.55	N	13.31	E	10	2.8	CENTRAL ITALY
			2017-01-18 12:05:17.6	42.56	N	13.28	E	11	2.9	CENTRAL ITALY
			2017-01-18 12:07:34.3	42.55	N	13.31	E	10	2.5	CENTRAL ITALY
			2017-01-18 12:10:50.8	42.53	N	13.30	E	10	2.9	CENTRAL ITALY
			2017-01-18 12:14:49.3	42.55	N	13.28	E	11	3.3	CENTRAL ITALY
			2017-01-18 12:16:26.4	42.53	N	13.30	E	13	2.7	CENTRAL ITALY
			2017-01-18 12:25:26.2	42.48	N	13.29	E	10	2.7	CENTRAL ITALY
			2017-01-18 12:26:38.8	42.55	N	13.26	E	14	2.5	CENTRAL ITALY
			2017-01-18 12:30:49.1	42.51	N	13.28	E	12	3.5	CENTRAL ITALY
			2017-01-18 12:32:30.2	42.53	N	13.31	E	10	3.1	CENTRAL ITALY
			2017-01-18 12:34:14.9	42.51	N	13.28	E	11	2.7	CENTRAL ITALY
			2017-01-18 12:38:58.1	42.50	N	13.28	E	14	2.8	CENTRAL ITALY
			2017-01-18 12:41:15.7	42.50	N	13.29	E	10	2.7	CENTRAL ITALY
			2017-01-18 12:42:17.5	42.51	N	13.29	E	14	2.9	CENTRAL ITALY
		III	2017-01-18 13:11:49.0	42.59	N	13.26	E	12	2.8	CENTRAL ITALY
			2017-01-18 13:18:18.9	42.54	N	13.29	E	14	2.5	CENTRAL ITALY
1		F	2017-01-18 13:19:52.7	42.49	N	13.27	E	12	3.8	CENTRAL ITALY
			2017-01-18 13:22:25.9	42.53	N	13.29	E	11	2.7	CENTRAL ITALY
		F	2017-01-18 13:27:10.1	42.60	N	13.30	E	10	2.6	CENTRAL ITALY
		IV	2017-01-18 13:30:33.5	42.51	N	13.31	E	10	3	CENTRAL ITALY
306		V	2017-01-18 13:33:37.2	42.48	N	13.28	E	10	5.2	CENTRAL ITALY
		F	2017-01-18 13:35:21.9	42.54	N	13.26	E	11	3.8	CENTRAL ITALY
		F	2017-01-18 13:37:45.9	42.49	N	13.30	E	11	3.2	CENTRAL ITALY
		F	2017-01-18 13:39:48.0	42.56	N	13.29	E	9	3.2	CENTRAL ITALY
			2017-01-18 13:41:23.8	42.47	N	13.26	E	12	2.5	CENTRAL ITALY
			2017-01-18 13:43:38.4	42.48	N	13.26	E	13	3	CENTRAL ITALY
		F	2017-01-18 13:49:45.5	42.51	N	13.27	E	13	2.9	CENTRAL ITALY
		F	2017-01-18 13:53:36.8	42.59	N	13.27	E	13	2.8	CENTRAL ITALY
			2017-01-18 13:55:11.0	42.52	N	13.27	E	12	2.7	CENTRAL ITALY
			2017-01-18 13:56:31.7	42.52	N	13.29	E	15	3.5	CENTRAL ITALY
			2017-01-18 14:00:11.2	42.50	N	13.29	E	13	3.2	CENTRAL ITALY
			2017-01-18 14:01:08.9	42.61	N	13.32	E	8	3.8	CENTRAL ITALY
			2017-01-18 14:03:22.5	42.47	N	13.28	E	12	2.8	CENTRAL ITALY
			2017-01-18 14:05:01.1	42.56	N	13.31	E	9	2.5	CENTRAL ITALY
			2017-01-18 14:07:21.8	42.56	N	13.25	E	11	2.5	CENTRAL ITALY
		F	2017-01-18 14:12:43.2	42.51	N	13.27	E	13	3.3	CENTRAL ITALY
			2017-01-18 14:18:02.5	42.53	N	13.29	E	10	2.8	CENTRAL ITALY
			2017-01-18 14:22:20.0	42.51	N	13.29	E	10	2.7	CENTRAL ITALY
		F	2017-01-18 14:24:26.2	42.61	N	13.31	E	8	2.6	CENTRAL ITALY
			2017-01-18 14:29:25.4	42.50	N	13.29	E	13	2.5	CENTRAL ITALY
		F	2017-01-18 14:33:23.1	42.52	N	13.27	E	13	3	CENTRAL ITALY
		F	2017-01-18 14:37:49.8	42.51	N	13.37	E	9	3.6	CENTRAL ITALY
			2017-01-18 14:40:54.1	42.51	N	13.29	E	14	2.5	CENTRAL ITALY
			2017-01-18 14:48:11.8	42.60	N	13.31	E	11	3.3	CENTRAL ITALY
		F	2017-01-18 14:52:26.7	42.53	N	13.27	E	13	3.4	CENTRAL ITALY
			2017-01-18 14:55:20.8	42.58	N	13.30	E	10	2.5	CENTRAL ITALY
			2017-01-18 14:56:44.2	42.52	N	13.29	E	13	2.8	CENTRAL ITALY
			2017-01-18 15:00:56.8	42.49	N	13.26	E	14	2.6	CENTRAL ITALY
			2017-01-18 15:06:22.5	42.59	N	13.26	E	10	2.5	CENTRAL ITALY
		F	2017-01-18 15:11:39.2	42.52	N	13.32	E	9	3.6	CENTRAL ITALY
		F	2017-01-18 15:13:36.8	42.61	N	13.32	E	8	2.9	CENTRAL ITALY
23		IV	2017-01-18 15:16:13.5	42.65	N	13.21	E	10	4.6	CENTRAL ITALY
		F	2017-01-18 15:18:29.5	42.49	N	13.30	E	13	2.9	CENTRAL ITALY
			2017-01-18 15:28:54.7	42.55	N	13.29	E	14	2.5	CENTRAL ITALY
		F	2017-01-18 15:35:35.3	42.48	N	13.27	E	13	2.6	CENTRAL ITALY
			2017-01-18 15:43:03.2	42.49	N	13.31	E	14	2.9	CENTRAL ITALY
			2017-01-18 15:46:54.2	42.53	N	13.28	E	13	2.6	CENTRAL ITALY
			2017-01-18 15:51:27.4	42.58	N	13.31	E	11	2.7	CENTRAL ITALY
			2017-01-18 15:52:49.1	42.59	N	13.31	E	10	2.5	CENTRAL ITALY
			2017-01-18 15:59:54.2	42.55	N	13.29	E	13	2.8	CENTRAL ITALY
			2017-01-18 16:06:42.7	42.52	N	13.26	E	13	2.9	CENTRAL ITALY
			2017-01-18 16:12:02.7	42.50	N	13.31	E	14	2.8	CENTRAL ITALY
			2017-01-18 16:13:33.1	42.58	N	13.26	E	15	2.5	CENTRAL ITALY
			2017-01-18 16:14:59.6	42.52	N	13.28	E	12	2.5	CENTRAL ITALY
			2017-01-18 16:25:27.1	42.52	N	13.35	E	10	2.7	CENTRAL ITALY
			2017-01-18 16:25:27.1	42.52	N	13.35	E	10	2.7	CENTRAL ITALY
		F	2017-01-18 16:31:55.4	42.56	N	13.26	E	13	2.9	CENTRAL ITALY
11		IV	2017-01-18 16:45:17.3	42.47	N	13.31	E	12	3.7	CENTRAL ITALY
			2017-01-18 16:46:54.8	42.55	N	13.30	E	11	2.5	CENTRAL ITALY
			2017-01-18 16:53:26.6	42.51	N	13.30	E	14	2.7	CENTRAL ITALY
6		IV	2017-01-18 17:09:02.9	42.59	N	13.25	E	11	3.8	CENTRAL ITALY
			2017-01-18 17:10:39.7	42.60	N	13.33	E	9	2.8	CENTRAL ITALY
			2017-01-18 17:13:29.1	42.99	N	13.02	E	10	2.6	CENTRAL ITALY
		F	2017-01-18 17:18:06.5	42.59	N	13.23	E	11	2.6	CENTRAL ITALY
			2017-01-18 17:26:31.0	42.46	N	13.26	E	14	2.5	CENTRAL ITALY
		F	2017-01-18 17:27:44.0	42.57	N	13.34	E	8	3.3	CENTRAL ITALY
			2017-01-18 17:43:36.7	42.49	N	13.37	E	10	2.5	CENTRAL ITALY
			2017-01-18 17:45:49.3	42.59	N	13.31	E	10	3.1	CENTRAL ITALY
			2017-01-18 18:03:47.4	42.59	N	13.32	E	9	3.3	CENTRAL ITALY
			2017-01-18 18:16:08.5	42.49	N	13.32	E	12	2.7	CENTRAL ITALY
			2017-01-18 18:21:33.0	42.57	N	13.27	E	10	2.6	CENTRAL ITALY
			2017-01-18 18:36:32.8	42.53	N	13.28	E	12	2.5	CENTRAL ITALY
			2017-01-18 18:42:34.0	42.61	N	13.34	E	10	3.2	CENTRAL ITALY
			2017-01-18 18:54:33.1	42.59	N	13.24	E	11	2.7	CENTRAL ITALY
82		IV	2017-01-18 19:32:32.5	42.58	N	13.24	E	13	4.4	CENTRAL ITALY
		F	2017-01-18 19:47:51.7	42.60	N	13.24	E	12	2.5	CENTRAL ITALY
			2017-01-18 20:23:56.0	42.51	N	13.30	E	14	3.1	CENTRAL ITALY
			2017-01-18 21:24:18.1	42.59	N	13.29	E	9	2.6	CENTRAL ITALY
			2017-01-18 21:31:57.3	42.49	N	13.32	E	11	3.3	CENTRAL ITALY
			2017-01-18 21:57:13.5	42.62	N	13.29	E	8	2.8	CENTRAL ITALY
			2017-01-18 22:18:25.7	42.57	N	13.23	E	11	2.7	CENTRAL ITALY
			2017-01-18 22:21:10.4	42.52	N	13.29	E	12	2.5	CENTRAL ITALY
			2017-01-18 22:44:36.0	42.64	N	13.28	E	11	3.1	CENTRAL ITALY
			2017-01-18 22:48:34.3	42.52	N	13.25	E	15	2.5	CENTRAL ITALY
			2017-01-18 23:33:40.6	42.55	N	13.25	E	11	2.6	CENTRAL ITALY
			2017-01-18 23:54:22.2	42.49	N	13.31	E	12	2.6	CENTRAL ITALY
			2017-01-18 23:56:06.4	42.58	N	13.32	E	9	3	CENTRAL ITALY
			2017-01-19 00:16:22.4	42.56	N	13.24	E	12	2.5	CENTRAL ITALY
			2017-01-19 00:18:45.8	42.51	N	13.37	E	9	2.5	CENTRAL ITALY
			2017-01-19 00:24:36.1	42.49	N	13.28	E	15	2.5	CENTRAL ITALY
			2017-01-19 00:55:06.3	42.59	N	13.24	E	13	2.5	CENTRAL ITALY
			2017-01-19 01:19:21.1	42.59	N	13.30	E	9	2.6	CENTRAL ITALY
			2017-01-19 01:25:46.7	42.59	N	13.30	E	9	2.6	CENTRAL ITALY
3		F	2017-01-19 01:28:43.3	42.55	N	13.26	E	10	3.5	CENTRAL ITALY
			2017-01-19 01:36:12.6	42.61	N	13.30	E	10	2.6	CENTRAL ITALY
			2017-01-19 01:39:34.5	42.58	N	13.32	E	9	2.7	CENTRAL ITALY
			2017-01-19 01:50:12.7	42.59	N	13.32	E	8	2.6	CENTRAL ITALY
4		III	2017-01-19 01:53:07.5	42.60	N	13.30	E	8	3.5	CENTRAL ITALY
1		F	2017-01-19 01:55:19.5	42.49	N	13.32	E	14	2.5	CENTRAL ITALY
			2017-01-19 02:32:46.1	43.13	N	10.99	E	10	2.8	CENTRAL ITALY
			2017-01-19 03:16:18.2	42.60	N	13.30	E	9	2.6	CENTRAL ITALY
			2017-01-19 03:41:15.5	42.59	N	13.30	E	9	2.7	CENTRAL ITALY
			2017-01-19 03:47:24.1	42.52	N	13.33	E	9	2.7	CENTRAL ITALY
		F	2017-01-19 04:15:29.3	42.54	N	13.31	E	12	3	CENTRAL ITALY
			2017-01-19 04:37:09.4	42.60	N	13.29	E	9	2.7	CENTRAL ITALY
			2017-01-19 04:46:27.9	42.58	N	13.28	E	10	3.1	CENTRAL ITALY
		F	2017-01-19 05:12:14.9	42.51	N	13.27	E	15	2.9	CENTRAL ITALY
			2017-01-19 05:25:13.5	42.61	N	13.32	E	8	2.8	CENTRAL ITALY
			2017-01-19 05:37:33.5	42.59	N	13.32	E	9	2.7	CENTRAL ITALY
			2017-01-19 05:50:52.3	42.54	N	13.29	E	10	2.7	CENTRAL ITALY
			2017-01-19 05:55:12.5	42.48	N	13.32	E	14	2.7	CENTRAL ITALY
			2017-01-19 06:30:37.3	42.57	N	13.25	E	11	2.6	CENTRAL ITALY
			2017-01-19 06:42:37.9	42.48	N	13.27	E	13	2.6	CENTRAL ITALY
			2017-01-19 07:35:07.6	42.55	N	13.26	E	12	2.5	CENTRAL ITALY
			2017-01-19 08:52:35.0	42.50	N	13.30	E	14	2.5	CENTRAL ITALY
			2017-01-19 09:23:12.0	42.59	N	13.32	E	9	2.6	CENTRAL ITALY
			2017-01-19 09:57:03.5	42.62	N	13.30	E	10	2.5	CENTRAL ITALY
2		F	2017-01-19 10:25:50.5	42.59	N	13.30	E	10	2.9	CENTRAL ITALY
			2017-01-19 10:46:19.9	42.58	N	13.30	E	10	3.1	CENTRAL ITALY
			2017-01-19 11:16:06.1	42.56	N	13.30	E	10	2.9	CENTRAL ITALY
			2017-01-19 11:56:08.4	42.60	N	13.25	E	11	2.6	CENTRAL ITALY
			2017-01-19 12:49:09.9	42.60	N	13.25	E	11	2.5	CENTRAL ITALY
1		F	2017-01-19 13:24:39.2	42.58	N	13.22	E	11	2.6	CENTRAL ITALY
8		IV	2017-01-19 14:42:00.4	42.59	N	13.30	E	10	3.4	CENTRAL ITALY
			2017-01-19 14:50:58.8	42.57	N	13.26	E	11	2.5	CENTRAL ITALY
1		F	2017-01-19 15:09:16.6	42.90	N	13.19	E	10	2.8	CENTRAL ITALY

## Sheet: raw_data (day time)
Number of Testimonies			Date	Time UTC	Latitude	degrees	Longitude	degrees	Depth (km)	Mag	Region	name
411		V	2017-01-18	09:25:40.600000	42.55	N	13.26	E	9	5.3	CENTRAL	ITALY
		F	2017-01-18	09:31:05.800000	42.58	N	13.27	E	9	2.6	CENTRAL	ITALY
			2017-01-18	09:34:44.400000	42.57	N	13.28	E	11	2.5	CENTRAL	ITALY
		F	2017-01-18	09:52:11.800000	42.91	N	13.13	E	8	3.2	CENTRAL	ITALY
			2017-01-18	09:56:34.900000	42.60	N	13.27	E	15	2.5	CENTRAL	ITALY
			2017-01-18	10:05:42.900000	42.61	N	13.26	E	11	2.7	CENTRAL	ITALY
			2017-01-18	10:07:49.100000	42.58	N	13.31	E	12	2.9	CENTRAL	ITALY
		F	2017-01-18	10:09:01.700000	42.54	N	13.26	E	11	2.5	CENTRAL	ITALY
			2017-01-18	10:11:57.300000	42.58	N	13.25	E	11	2.7	CENTRAL	ITALY
285	1	V	2017-01-18	10:14:10.800000	42.53	N	13.28	E	9	5.7	CENTRAL	ITALY
		F	2017-01-18	10:15:33.200000	42.53	N	13.29	E	10	4.7	CENTRAL	ITALY
		F	2017-01-18	10:16:39.500000	42.55	N	13.28	E	11	4.6	CENTRAL	ITALY
			2017-01-18	10:19:21.200000	42.53	N	13.28	E	11	3.2	CENTRAL	ITALY
		F	2017-01-18	10:21:00.800000	42.58	N	13.29	E	8	3.1	CENTRAL	ITALY
			2017-01-18	10:22:30.800000	42.52	N	13.30	E	12	3.2	CENTRAL	ITALY
		F	2017-01-18	10:24:16.300000	42.60	N	13.17	E	10	4.5	CENTRAL	ITALY
140		VI	2017-01-18	10:25:25	42.49	N	13.31	E	9	5.6	CENTRAL	ITALY
		F	2017-01-18	10:30:33.300000	42.53	N	13.27	E	10	3.8	CENTRAL	ITALY
		F	2017-01-18	10:34:09.700000	42.57	N	13.26	E	10	3.2	CENTRAL	ITALY
			2017-01-18	10:37:46.100000	42.51	N	13.27	E	13	3.7	CENTRAL	ITALY
		F	2017-01-18	10:39:24.500000	42.54	N	13.29	E	11	4.1	CENTRAL	ITALY
		F	2017-01-18	10:41:42.500000	42.48	N	13.28	E	10	3.7	CENTRAL	ITALY
			2017-01-18	10:43:47.500000	42.50	N	13.29	E	10	3.0	CENTRAL	ITALY
			2017-01-18	10:46:33.400000	42.52	N	13.27	E	14	2.9	CENTRAL	ITALY
		F	2017-01-18	10:51:16.200000	42.49	N	13.28	E	11	3.5	CENTRAL	ITALY
			2017-01-18	10:53:47.400000	42.50	N	13.28	E	9	3.0	CENTRAL	ITALY
		F	2017-01-18	11:00:53.700000	42.52	N	13.36	E	11	3.5	CENTRAL	ITALY
		F	2017-01-18	11:04:43.300000	42.53	N	13.27	E	12	3.4	CENTRAL	ITALY
18		V	2017-01-18	11:07:37.900000	42.62	N	13.24	E	10	4.7	CENTRAL	ITALY
			2017-01-18	11:11:30.800000	42.58	N	13.25	E	11	2.6	CENTRAL	ITALY
		F	2017-01-18	11:13:33	42.50	N	13.31	E	11	2.8	CENTRAL	ITALY
			2017-01-18	11:16:26.800000	42.50	N	13.29	E	11	2.5	CENTRAL	ITALY
		F	2017-01-18	11:19:30.300000	42.56	N	13.26	E	11	2.5	CENTRAL	ITALY
			2017-01-18	11:21:27.100000	42.60	N	13.06	E	5	2.6	CENTRAL	ITALY
			2017-01-18	11:22:46.400000	42.51	N	13.32	E	12	2.9	CENTRAL	ITALY
			2017-01-18	11:26:57	42.53	N	13.29	E	11	2.6	CENTRAL	ITALY
			2017-01-18	11:30:19	42.55	N	13.23	E	4	2.6	CENTRAL	ITALY
			2017-01-18	11:34:12.700000	42.58	N	13.26	E	13	2.8	CENTRAL	ITALY
			2017-01-18	11:39:44.900000	42.56	N	13.26	E	13	2.7	CENTRAL	ITALY
		F	2017-01-18	11:51:05	42.55	N	13.31	E	10	2.6	CENTRAL	ITALY
			2017-01-18	11:56:58.800000	42.53	N	13.28	E	14	2.9	CENTRAL	ITALY
		F	2017-01-18	12:01:17.400000	42.54	N	13.27	E	14	4.1	CENTRAL	ITALY
			2017-01-18	12:03:36.400000	42.55	N	13.31	E	10	2.8	CENTRAL	ITALY
			2017-01-18	12:05:17.600000	42.56	N	13.28	E	11	2.9	CENTRAL	ITALY
			2017-01-18	12:07:34.300000	42.55	N	13.31	E	10	2.5	CENTRAL	ITALY
			2017-01-18	12:10:50.800000	42.53	N	13.30	E	10	2.9	CENTRAL	ITALY
			2017-01-18	12:14:49.300000	42.55	N	13.28	E	11	3.3	CENTRAL	ITALY
			2017-01-18	12:16:26.400000	42.53	N	13.30	E	13	2.7	CENTRAL	ITALY
			2017-01-18	12:25:26.200000	42.48	N	13.29	E	10	2.7	CENTRAL	ITALY
			2017-01-18	12:26:38.800000	42.55	N	13.26	E	14	2.5	CENTRAL	ITALY
			2017-01-18	12:30:49.100000	42.51	N	13.28	E	12	3.5	CENTRAL	ITALY
			2017-01-18	12:32:30.200000	42.53	N	13.31	E	10	3.1	CENTRAL	ITALY
			2017-01-18	12:34:14.900000	42.51	N	13.28	E	11	2.7	CENTRAL	ITALY
			2017-01-18	12:38:58.100000	42.50	N	13.28	E	14	2.8	CENTRAL	ITALY
			2017-01-18	12:41:15.700000	42.50	N	13.29	E	10	2.7	CENTRAL	ITALY
			2017-01-18	12:42:17.500000	42.51	N	13.29	E	14	2.9	CENTRAL	ITALY
		III	2017-01-18	13:11:49	42.59	N	13.26	E	12	2.8	CENTRAL	ITALY
			2017-01-18	13:18:18.900000	42.54	N	13.29	E	14	2.5	CENTRAL	ITALY
1		F	2017-01-18	13:19:52.700000	42.49	N	13.27	E	12	3.8	CENTRAL	ITALY
			2017-01-18	13:22:25.900000	42.53	N	13.29	E	11	2.7	CENTRAL	ITALY
		F	2017-01-18	13:27:10.100000	42.60	N	13.30	E	10	2.6	CENTRAL	ITALY
		IV	2017-01-18	13:30:33.500000	42.51	N	13.31	E	10	3.0	CENTRAL	ITALY
306		V	2017-01-18	13:33:37.200000	42.48	N	13.28	E	10	5.2	CENTRAL	ITALY
		F	2017-01-18	13:35:21.900000	42.54	N	13.26	E	11	3.8	CENTRAL	ITALY
		F	2017-01-18	13:37:45.900000	42.49	N	13.30	E	11	3.2	CENTRAL	ITALY
		F	2017-01-18	13:39:48	42.56	N	13.29	E	9	3.2	CENTRAL	ITALY
			2017-01-18	13:41:23.800000	42.47	N	13.26	E	12	2.5	CENTRAL	ITALY
			2017-01-18	13:43:38.400000	42.48	N	13.26	E	13	3.0	CENTRAL	ITALY
		F	2017-01-18	13:49:45.500000	42.51	N	13.27	E	13	2.9	CENTRAL	ITALY
		F	2017-01-18	13:53:36.800000	42.59	N	13.27	E	13	2.8	CENTRAL	ITALY
			2017-01-18	13:55:11	42.52	N	13.27	E	12	2.7	CENTRAL	ITALY
			2017-01-18	13:56:31.700000	42.52	N	13.29	E	15	3.5	CENTRAL	ITALY
			2017-01-18	14:00:11.200000	42.50	N	13.29	E	13	3.2	CENTRAL	ITALY
			2017-01-18	14:01:08.900000	42.61	N	13.32	E	8	3.8	CENTRAL	ITALY
			2017-01-18	14:03:22.500000	42.47	N	13.28	E	12	2.8	CENTRAL	ITALY
			2017-01-18	14:05:01.100000	42.56	N	13.31	E	9	2.5	CENTRAL	ITALY
			2017-01-18	14:07:21.800000	42.56	N	13.25	E	11	2.5	CENTRAL	ITALY
		F	2017-01-18	14:12:43.200000	42.51	N	13.27	E	13	3.3	CENTRAL	ITALY
			2017-01-18	14:18:02.500000	42.53	N	13.29	E	10	2.8	CENTRAL	ITALY
			2017-01-18	14:22:20	42.51	N	13.29	E	10	2.7	CENTRAL	ITALY
		F	2017-01-18	14:24:26.200000	42.61	N	13.31	E	8	2.6	CENTRAL	ITALY
			2017-01-18	14:29:25.400000	42.50	N	13.29	E	13	2.5	CENTRAL	ITALY
		F	2017-01-18	14:33:23.100000	42.52	N	13.27	E	13	3.0	CENTRAL	ITALY
		F	2017-01-18	14:37:49.800000	42.51	N	13.37	E	9	3.6	CENTRAL	ITALY
			2017-01-18	14:40:54.100000	42.51	N	13.29	E	14	2.5	CENTRAL	ITALY
			2017-01-18	14:48:11.800000	42.60	N	13.31	E	11	3.3	CENTRAL	ITALY
		F	2017-01-18	14:52:26.700000	42.53	N	13.27	E	13	3.4	CENTRAL	ITALY
			2017-01-18	14:55:20.800000	42.58	N	13.30	E	10	2.5	CENTRAL	ITALY
			2017-01-18	14:56:44.200000	42.52	N	13.29	E	13	2.8	CENTRAL	ITALY
			2017-01-18	15:00:56.800000	42.49	N	13.26	E	14	2.6	CENTRAL	ITALY
			2017-01-18	15:06:22.500000	42.59	N	13.26	E	10	2.5	CENTRAL	ITALY
		F	2017-01-18	15:11:39.200000	42.52	N	13.32	E	9	3.6	CENTRAL	ITALY
		F	2017-01-18	15:13:36.800000	42.61	N	13.32	E	8	2.9	CENTRAL	ITALY
23		IV	2017-01-18	15:16:13.500000	42.65	N	13.21	E	10	4.6	CENTRAL	ITALY
		F	2017-01-18	15:18:29.500000	42.49	N	13.30	E	13	2.9	CENTRAL	ITALY
			2017-01-18	15:28:54.700000	42.55	N	13.29	E	14	2.5	CENTRAL	ITALY
		F	2017-01-18	15:35:35.300000	42.48	N	13.27	E	13	2.6	CENTRAL	ITALY
			2017-01-18	15:43:03.200000	42.49	N	13.31	E	14	2.9	CENTRAL	ITALY
			2017-01-18	15:46:54.200000	42.53	N	13.28	E	13	2.6	CENTRAL	ITALY
			2017-01-18	15:51:27.400000	42.58	N	13.31	E	11	2.7	CENTRAL	ITALY
			2017-01-18	15:52:49.100000	42.59	N	13.31	E	10	2.5	CENTRAL	ITALY
			2017-01-18	15:59:54.200000	42.55	N	13.29	E	13	2.8	CENTRAL	ITALY
			2017-01-18	16:06:42.700000	42.52	N	13.26	E	13	2.9	CENTRAL	ITALY
			2017-01-18	16:12:02.700000	42.50	N	13.31	E	14	2.8	CENTRAL	ITALY
			2017-01-18	16:13:33.100000	42.58	N	13.26	E	15	2.5	CENTRAL	ITALY
			2017-01-18	16:14:59.600000	42.52	N	13.28	E	12	2.5	CENTRAL	ITALY
			2017-01-18	16:25:27.100000	42.52	N	13.35	E	10	2.7	CENTRAL	ITALY
			2017-01-18	16:25:27.100000	42.52	N	13.35	E	10	2.7	CENTRAL	ITALY
		F	2017-01-18	16:31:55.400000	42.56	N	13.26	E	13	2.9	CENTRAL	ITALY
11		IV	2017-01-18	16:45:17.300000	42.47	N	13.31	E	12	3.7	CENTRAL	ITALY
			2017-01-18	16:46:54.800000	42.55	N	13.30	E	11	2.5	CENTRAL	ITALY
			2017-01-18	16:53:26.600000	42.51	N	13.30	E	14	2.7	CENTRAL	ITALY
6		IV	2017-01-18	17:09:02.900000	42.59	N	13.25	E	11	3.8	CENTRAL	ITALY
			2017-01-18	17:10:39.700000	42.60	N	13.33	E	9	2.8	CENTRAL	ITALY
			2017-01-18	17:13:29.100000	42.99	N	13.02	E	10	2.6	CENTRAL	ITALY
		F	2017-01-18	17:18:06.500000	42.59	N	13.23	E	11	2.6	CENTRAL	ITALY
			2017-01-18	17:26:31	42.46	N	13.26	E	14	2.5	CENTRAL	ITALY
		F	2017-01-18	17:27:44	42.57	N	13.34	E	8	3.3	CENTRAL	ITALY
			2017-01-18	17:43:36.700000	42.49	N	13.37	E	10	2.5	CENTRAL	ITALY
			2017-01-18	17:45:49.300000	42.59	N	13.31	E	10	3.1	CENTRAL	ITALY
			2017-01-18	18:03:47.400000	42.59	N	13.32	E	9	3.3	CENTRAL	ITALY
			2017-01-18	18:16:08.500000	42.49	N	13.32	E	12	2.7	CENTRAL	ITALY
			2017-01-18	18:21:33	42.57	N	13.27	E	10	2.6	CENTRAL	ITALY
			2017-01-18	18:36:32.800000	42.53	N	13.28	E	12	2.5	CENTRAL	ITALY
			2017-01-18	18:42:34	42.61	N	13.34	E	10	3.2	CENTRAL	ITALY
			2017-01-18	18:54:33.100000	42.59	N	13.24	E	11	2.7	CENTRAL	ITALY
82		IV	2017-01-18	19:32:32.500000	42.58	N	13.24	E	13	4.4	CENTRAL	ITALY
		F	2017-01-18	19:47:51.700000	42.60	N	13.24	E	12	2.5	CENTRAL	ITALY
			2017-01-18	20:23:56	42.51	N	13.30	E	14	3.1	CENTRAL	ITALY
			2017-01-18	21:24:18.100000	42.59	N	13.29	E	9	2.6	CENTRAL	ITALY
			2017-01-18	21:31:57.300000	42.49	N	13.32	E	11	3.3	CENTRAL	ITALY
			2017-01-18	21:57:13.500000	42.62	N	13.29	E	8	2.8	CENTRAL	ITALY
			2017-01-18	22:18:25.700000	42.57	N	13.23	E	11	2.7	CENTRAL	ITALY
			2017-01-18	22:21:10.400000	42.52	N	13.29	E	12	2.5	CENTRAL	ITALY
			2017-01-18	22:44:36	42.64	N	13.28	E	11	3.1	CENTRAL	ITALY
			2017-01-18	22:48:34.300000	42.52	N	13.25	E	15	2.5	CENTRAL	ITALY
			2017-01-18	23:33:40.600000	42.55	N	13.25	E	11	2.6	CENTRAL	ITALY
			2017-01-18	23:54:22.200000	42.49	N	13.31	E	12	2.6	CENTRAL	ITALY
			2017-01-18	23:56:06.400000	42.58	N	13.32	E	9	3.0	CENTRAL	ITALY
			2017-01-19	00:16:22.400000	42.56	N	13.24	E	12	2.5	CENTRAL	ITALY
			2017-01-19	00:18:45.800000	42.51	N	13.37	E	9	2.5	CENTRAL	ITALY
			2017-01-19	00:24:36.100000	42.49	N	13.28	E	15	2.5	CENTRAL	ITALY
			2017-01-19	00:55:06.300000	42.59	N	13.24	E	13	2.5	CENTRAL	ITALY
			2017-01-19	01:19:21.100000	42.59	N	13.30	E	9	2.6	CENTRAL	ITALY
			2017-01-19	01:25:46.700000	42.59	N	13.30	E	9	2.6	CENTRAL	ITALY
3		F	2017-01-19	01:28:43.300000	42.55	N	13.26	E	10	3.5	CENTRAL	ITALY
			2017-01-19	01:36:12.600000	42.61	N	13.30	E	10	2.6	CENTRAL	ITALY
			2017-01-19	01:39:34.500000	42.58	N	13.32	E	9	2.7	CENTRAL	ITALY
			2017-01-19	01:50:12.700000	42.59	N	13.32	E	8	2.6	CENTRAL	ITALY
4		III	2017-01-19	01:53:07.500000	42.60	N	13.30	E	8	3.5	CENTRAL	ITALY
1		F	2017-01-19	01:55:19.500000	42.49	N	13.32	E	14	2.5	CENTRAL	ITALY
			2017-01-19	02:32:46.100000	43.13	N	10.99	E	10	2.8	CENTRAL	ITALY
			2017-01-19	03:16:18.200000	42.60	N	13.30	E	9	2.6	CENTRAL	ITALY
			2017-01-19	03:41:15.500000	42.59	N	13.30	E	9	2.7	CENTRAL	ITALY
			2017-01-19	03:47:24.100000	42.52	N	13.33	E	9	2.7	CENTRAL	ITALY
		F	2017-01-19	04:15:29.300000	42.54	N	13.31	E	12	3.0	CENTRAL	ITALY
			2017-01-19	04:37:09.400000	42.60	N	13.29	E	9	2.7	CENTRAL	ITALY
			2017-01-19	04:46:27.900000	42.58	N	13.28	E	10	3.1	CENTRAL	ITALY
		F	2017-01-19	05:12:14.900000	42.51	N	13.27	E	15	2.9	CENTRAL	ITALY
			2017-01-19	05:25:13.500000	42.61	N	13.32	E	8	2.8	CENTRAL	ITALY
			2017-01-19	05:37:33.500000	42.59	N	13.32	E	9	2.7	CENTRAL	ITALY
			2017-01-19	05:50:52.300000	42.54	N	13.29	E	10	2.7	CENTRAL	ITALY
			2017-01-19	05:55:12.500000	42.48	N	13.32	E	14	2.7	CENTRAL	ITALY
			2017-01-19	06:30:37.300000	42.57	N	13.25	E	11	2.6	CENTRAL	ITALY
			2017-01-19	06:42:37.900000	42.48	N	13.27	E	13	2.6	CENTRAL	ITALY
			2017-01-19	07:35:07.600000	42.55	N	13.26	E	12	2.5	CENTRAL	ITALY
			2017-01-19	08:52:35	42.50	N	13.30	E	14	2.5	CENTRAL	ITALY
			2017-01-19	09:23:12	42.59	N	13.32	E	9	2.6	CENTRAL	ITALY
			2017-01-19	09:57:03.500000	42.62	N	13.30	E	10	2.5	CENTRAL	ITALY
2		F	2017-01-19	10:25:50.500000	42.59	N	13.30	E	10	2.9	CENTRAL	ITALY
			2017-01-19	10:46:19.900000	42.58	N	13.30	E	10	3.1	CENTRAL	ITALY
			2017-01-19	11:16:06.100000	42.56	N	13.30	E	10	2.9	CENTRAL	ITALY
			2017-01-19	11:56:08.400000	42.60	N	13.25	E	11	2.6	CENTRAL	ITALY
			2017-01-19	12:49:09.900000	42.60	N	13.25	E	11	2.5	CENTRAL	ITALY
1		F	2017-01-19	13:24:39.200000	42.58	N	13.22	E	11	2.6	CENTRAL	ITALY
8		IV	2017-01-19	14:42:00.400000	42.59	N	13.30	E	10	3.4	CENTRAL	ITALY
			2017-01-19	14:50:58.800000	42.57	N	13.26	E	11	2.5	CENTRAL	ITALY
1		F	2017-01-19	15:09:16.600000	42.90	N	13.19	E	10	2.8	CENTRAL	ITALY

## Sheet: avalanche_time
	Estimated time avalanche	Mag
	to be confirmed !
	2017-01-18 15:48:00	0	00:00:00		Lower bound
	2017-01-18 15:48:00	6	02:00:00
	2017-01-18 16:08:00	0	00:00:00		Upper bound
	2017-01-18 16:08:00	6	02:00:00
	2017-01-18 15:58:00	0	00:00:00		middle
	2017-01-18 15:58:00	6	02:00:00

## Sheet: Statistical threshold
	2017-01-18 09:00:00	3
	2017-01-18 23:56:06	3

## Sheet: Figure 1B
Number of Testimonies		Date	TimeUTC	Mag			time	>5		time	5>M>4		time	4>M>3		time	M<3
411		V	2017-01-18 09:25:41	5.3			2017-01-18 09:25:41	5.3		2017-01-18 10:15:33	4.7		2017-01-18 09:52:12	3.2		2017-01-18 09:31:06	2.6
		F	2017-01-18 09:31:06	2.6			2017-01-18 10:14:11	5.7		2017-01-18 10:16:39	4.6		2017-01-18 10:19:21	3.2		2017-01-18 09:34:44	2.5
			2017-01-18 09:34:44	2.5			2017-01-18 10:25:25	5.6		2017-01-18 10:24:16	4.5		2017-01-18 10:21:01	3.1		2017-01-18 09:56:35	2.5
		F	2017-01-18 09:52:12	3.2			2017-01-18 13:33:37	5.2		2017-01-18 10:39:24	4.1		2017-01-18 10:22:31	3.2		2017-01-18 10:05:43	2.7
			2017-01-18 09:56:35	2.5						2017-01-18 11:07:38	4.7		2017-01-18 10:30:33	3.8		2017-01-18 10:07:49	2.9
			2017-01-18 10:05:43	2.7						2017-01-18 12:01:17	4.1		2017-01-18 10:34:10	3.2		2017-01-18 10:09:02	2.5
			2017-01-18 10:07:49	2.9						2017-01-18 15:16:13	4.6		2017-01-18 10:37:46	3.7		2017-01-18 10:11:57	2.7
		F	2017-01-18 10:09:02	2.5						2017-01-18 19:32:32	4.4		2017-01-18 10:41:42	3.7		2017-01-18 10:46:33	2.9
			2017-01-18 10:11:57	2.7			2017-01-18 16:50:00						2017-01-18 10:51:16	3.5		2017-01-18 11:11:31	2.6
285	1	V	2017-01-18 10:14:11	5.7									2017-01-18 11:00:54	3.5		2017-01-18 11:13:33	2.8
		F	2017-01-18 10:15:33	4.7		42753.7	5.75						2017-01-18 11:04:43	3.4		2017-01-18 11:16:27	2.5
		F	2017-01-18 10:16:39	4.6		42753.7	5.5						2017-01-18 12:14:49	3.3		2017-01-18 11:19:30	2.5
			2017-01-18 10:19:21	3.2		42753.7	5.25						2017-01-18 12:30:49	3.5		2017-01-18 11:21:27	2.6
		F	2017-01-18 10:21:01	3.1		42753.7	5						2017-01-18 12:32:30	3.1		2017-01-18 11:22:46	2.9
			2017-01-18 10:22:31	3.2									2017-01-18 13:19:53	3.8		2017-01-18 11:26:57	2.6
		F	2017-01-18 10:24:16	4.5									2017-01-18 13:35:22	3.8		2017-01-18 11:30:19	2.6
140		VI	2017-01-18 10:25:25	5.6									2017-01-18 13:37:46	3.2		2017-01-18 11:34:13	2.8
		F	2017-01-18 10:30:33	3.8		42753.4	2017-01-18 09:00:00						2017-01-18 13:39:48	3.2		2017-01-18 11:39:45	2.7
		F	2017-01-18 10:34:10	3.2									2017-01-18 13:56:32	3.5		2017-01-18 11:51:05	2.6
			2017-01-18 10:37:46	3.7									2017-01-18 14:00:11	3.2		2017-01-18 11:56:59	2.9
		F	2017-01-18 10:39:24	4.1									2017-01-18 14:01:09	3.8		2017-01-18 12:03:36	2.8
		F	2017-01-18 10:41:42	3.7									2017-01-18 14:12:43	3.3		2017-01-18 12:05:18	2.9
			2017-01-18 10:43:47	3									2017-01-18 14:37:50	3.6		2017-01-18 12:07:34	2.5
			2017-01-18 10:46:33	2.9									2017-01-18 14:48:12	3.3		2017-01-18 12:10:51	2.9
		F	2017-01-18 10:51:16	3.5									2017-01-18 14:52:27	3.4		2017-01-18 12:16:26	2.7
			2017-01-18 10:53:47	3									2017-01-18 15:11:39	3.6		2017-01-18 12:25:26	2.7
		F	2017-01-18 11:00:54	3.5									2017-01-18 16:45:17	3.7		2017-01-18 12:26:39	2.5
		F	2017-01-18 11:04:43	3.4									2017-01-18 17:09:03	3.8		2017-01-18 12:34:15	2.7
18		V	2017-01-18 11:07:38	4.7									2017-01-18 17:27:44	3.3		2017-01-18 12:38:58	2.8
			2017-01-18 11:11:31	2.6									2017-01-18 17:45:49	3.1		2017-01-18 12:41:16	2.7
		F	2017-01-18 11:13:33	2.8									2017-01-18 18:03:47	3.3		2017-01-18 12:42:17	2.9
			2017-01-18 11:16:27	2.5									2017-01-18 18:42:34	3.2		2017-01-18 13:11:49	2.8
		F	2017-01-18 11:19:30	2.5									2017-01-18 20:23:56	3.1		2017-01-18 13:18:19	2.5
			2017-01-18 11:21:27	2.6									2017-01-18 21:31:57	3.3		2017-01-18 13:22:26	2.7
			2017-01-18 11:22:46	2.9									2017-01-18 22:44:36	3.1		2017-01-18 13:27:10	2.6
			2017-01-18 11:26:57	2.6												2017-01-18 13:41:24	2.5
			2017-01-18 11:30:19	2.6												2017-01-18 13:49:45	2.9
			2017-01-18 11:34:13	2.8												2017-01-18 13:53:37	2.8
			2017-01-18 11:39:45	2.7												2017-01-18 13:55:11	2.7
		F	2017-01-18 11:51:05	2.6												2017-01-18 14:03:22	2.8
			2017-01-18 11:56:59	2.9												2017-01-18 14:05:01	2.5
		F	2017-01-18 12:01:17	4.1												2017-01-18 14:07:22	2.5
			2017-01-18 12:03:36	2.8												2017-01-18 14:18:02	2.8
			2017-01-18 12:05:18	2.9												2017-01-18 14:22:20	2.7
			2017-01-18 12:07:34	2.5												2017-01-18 14:24:26	2.6
			2017-01-18 12:10:51	2.9												2017-01-18 14:29:25	2.5
			2017-01-18 12:14:49	3.3												2017-01-18 14:40:54	2.5
			2017-01-18 12:16:26	2.7												2017-01-18 14:55:21	2.5
			2017-01-18 12:25:26	2.7												2017-01-18 14:56:44	2.8
			2017-01-18 12:26:39	2.5												2017-01-18 15:00:57	2.6
			2017-01-18 12:30:49	3.5												2017-01-18 15:06:22	2.5
			2017-01-18 12:32:30	3.1												2017-01-18 15:13:37	2.9
			2017-01-18 12:34:15	2.7												2017-01-18 15:18:29	2.9
			2017-01-18 12:38:58	2.8												2017-01-18 15:28:55	2.5
			2017-01-18 12:41:16	2.7												2017-01-18 15:35:35	2.6
			2017-01-18 12:42:17	2.9												2017-01-18 15:43:03	2.9
		III	2017-01-18 13:11:49	2.8												2017-01-18 15:46:54	2.6
			2017-01-18 13:18:19	2.5												2017-01-18 15:51:27	2.7
1		F	2017-01-18 13:19:53	3.8												2017-01-18 15:52:49	2.5
			2017-01-18 13:22:26	2.7												2017-01-18 15:59:54	2.8
		F	2017-01-18 13:27:10	2.6												2017-01-18 16:06:43	2.9
		IV	2017-01-18 13:30:33	3												2017-01-18 16:12:03	2.8
306		V	2017-01-18 13:33:37	5.2												2017-01-18 16:13:33	2.5
		F	2017-01-18 13:35:22	3.8												2017-01-18 16:15:00	2.5
		F	2017-01-18 13:37:46	3.2												2017-01-18 16:25:27	2.7
		F	2017-01-18 13:39:48	3.2												2017-01-18 16:25:27	2.7
			2017-01-18 13:41:24	2.5												2017-01-18 16:31:55	2.9
			2017-01-18 13:43:38	3												2017-01-18 16:46:55	2.5
		F	2017-01-18 13:49:45	2.9												2017-01-18 16:53:27	2.7
		F	2017-01-18 13:53:37	2.8												2017-01-18 17:10:40	2.8
			2017-01-18 13:55:11	2.7												2017-01-18 17:13:29	2.6
			2017-01-18 13:56:32	3.5												2017-01-18 17:18:06	2.6
			2017-01-18 14:00:11	3.2												2017-01-18 17:26:31	2.5
			2017-01-18 14:01:09	3.8												2017-01-18 17:43:37	2.5
			2017-01-18 14:03:22	2.8												2017-01-18 18:16:08	2.7
			2017-01-18 14:05:01	2.5												2017-01-18 18:21:33	2.6
			2017-01-18 14:07:22	2.5												2017-01-18 18:36:33	2.5
		F	2017-01-18 14:12:43	3.3												2017-01-18 18:54:33	2.7
			2017-01-18 14:18:02	2.8												2017-01-18 19:47:52	2.5
			2017-01-18 14:22:20	2.7												2017-01-18 21:24:18	2.6
		F	2017-01-18 14:24:26	2.6												2017-01-18 21:57:13	2.8
			2017-01-18 14:29:25	2.5												2017-01-18 22:18:26	2.7
		F	2017-01-18 14:33:23	3												2017-01-18 22:21:10	2.5
		F	2017-01-18 14:37:50	3.6												2017-01-18 22:48:34	2.5
			2017-01-18 14:40:54	2.5												2017-01-18 23:33:41	2.6
			2017-01-18 14:48:12	3.3												2017-01-18 23:54:22	2.6
		F	2017-01-18 14:52:27	3.4
			2017-01-18 14:55:21	2.5
			2017-01-18 14:56:44	2.8
			2017-01-18 15:00:57	2.6
			2017-01-18 15:06:22	2.5
		F	2017-01-18 15:11:39	3.6
		F	2017-01-18 15:13:37	2.9
23		IV	2017-01-18 15:16:13	4.6
		F	2017-01-18 15:18:29	2.9
			2017-01-18 15:28:55	2.5
		F	2017-01-18 15:35:35	2.6
			2017-01-18 15:43:03	2.9
			2017-01-18 15:46:54	2.6
			2017-01-18 15:51:27	2.7
			2017-01-18 15:52:49	2.5
			2017-01-18 15:59:54	2.8
			2017-01-18 16:06:43	2.9
			2017-01-18 16:12:03	2.8
			2017-01-18 16:13:33	2.5
			2017-01-18 16:15:00	2.5
			2017-01-18 16:25:27	2.7
			2017-01-18 16:25:27	2.7
		F	2017-01-18 16:31:55	2.9
11		IV	2017-01-18 16:45:17	3.7
			2017-01-18 16:46:55	2.5
			2017-01-18 16:53:27	2.7
6		IV	2017-01-18 17:09:03	3.8
			2017-01-18 17:10:40	2.8
			2017-01-18 17:13:29	2.6
		F	2017-01-18 17:18:06	2.6
			2017-01-18 17:26:31	2.5
		F	2017-01-18 17:27:44	3.3
			2017-01-18 17:43:37	2.5
			2017-01-18 17:45:49	3.1
			2017-01-18 18:03:47	3.3
			2017-01-18 18:16:08	2.7
			2017-01-18 18:21:33	2.6
			2017-01-18 18:36:33	2.5
			2017-01-18 18:42:34	3.2
			2017-01-18 18:54:33	2.7
82		IV	2017-01-18 19:32:32	4.4
		F	2017-01-18 19:47:52	2.5
			2017-01-18 20:23:56	3.1
			2017-01-18 21:24:18	2.6
			2017-01-18 21:31:57	3.3
			2017-01-18 21:57:13	2.8
			2017-01-18 22:18:26	2.7
			2017-01-18 22:21:10	2.5
			2017-01-18 22:44:36	3.1
			2017-01-18 22:48:34	2.5
			2017-01-18 23:33:41	2.6
			2017-01-18 23:54:22	2.6
			2017-01-18 23:56:06	3
