# Supplementary material for: The mechanism of delayed release in earthquake-induced avalanches
Source: Proc Math Phys Eng Sci. 2019 Jul 24;475(2227):20190092. doi: 10.1098/rspa.2019.0092 (PMC6694300; doi:10.1098/rspa.2019.0092)
Supplement: Data in Fig2D [file rspa20190092supp6.xlsx]

## Sheet: Schweizer_Jamieson_2001
25.0095	0.00124334
28.0152	0.00337478
30.0002	0.00550622
30.0004	0.012611
30.993	0.0161634
32.0138	0.0175844
32.0139	0.0204263
32.014	0.0232682
31.9859	0.0296625
32.0145	0.0353464
32.0146	0.0388988
33.0071	0.0403197
33.0073	0.0460036
33.0075	0.0509769
33.0076	0.0559503
33.0078	0.0616341
33.008	0.065897
33.0082	0.0715808
33.0084	0.0772647
33.0086	0.082238
33.0087	0.0872114
33.0089	0.0907638
34.0014	0.0921847
34.0016	0.098579
34.0301	0.103552
34.0302	0.107105
34.0305	0.113499
34.0307	0.119183
34.0308	0.123446
34.0026	0.126998
35.0234	0.126288
35.0235	0.12913
34.9952	0.131972
35.0237	0.136234
34.9955	0.140497
34.9956	0.14405
35.0242	0.149023
35.0244	0.154707
35.0245	0.15968
35.0247	0.165364
34.9967	0.173179
35.0252	0.179574
35.0254	0.184547
35.0257	0.190941
36.0464	0.190941
36.0467	0.197336
36.0185	0.20302
36.0187	0.209414
36.0189	0.214387
36.0191	0.21865
36.0193	0.224334
36.0194	0.228597
36.0196	0.234281
36.0198	0.239964
36.02	0.244227
36.0201	0.24849
37.0125	0.24778
37.0127	0.251332
37.0128	0.254174
37.013	0.260568
37.0132	0.266252
37.0134	0.271226
37.0135	0.275488
37.0137	0.281172
37.0139	0.286856
37.0141	0.291119
37.0143	0.297513
37.0146	0.306039
37.0148	0.311723
37.015	0.316696
37.0151	0.320249
38.0359	0.319538
38.0078	0.326643
38.0363	0.330906
38.0081	0.33659
38.065	0.342274
38.0085	0.346536
38.0087	0.35222
38.0088	0.356483
38.009	0.360746
38.0092	0.36643
38.0093	0.370693
38.0096	0.377798
38.0098	0.382771
38.01	0.389165
38.0102	0.394139
38.0103	0.398401
38.0105	0.404085
38.0107	0.409059
38.0108	0.412611
38.0111	0.419716
38.0112	0.423979
38.0113	0.42611
38.0115	0.431794
38.0118	0.438899
38.0119	0.441741
38.0121	0.447425
38.0123	0.453108
38.0125	0.458792
38.0129	0.471581
38.0132	0.479396
38.0134	0.48579
38.0136	0.491474
39.0344	0.492185
39.0348	0.501421
39.0349	0.505684
39.0352	0.512789
39.0355	0.521314
39.0356	0.525577
39.0358	0.52984
39.0359	0.534103
39.0361	0.539787
39.0363	0.54405
39.0365	0.549023
39.0367	0.556838
39.0369	0.561101
39.037	0.565364
39.0372	0.570337
39.0374	0.576021
39.0092	0.580995
40.0301	0.582416
40.0303	0.58952
40.0305	0.594494
40.0307	0.598757
40.0309	0.60444
40.031	0.609414
40.0312	0.614387
40.0314	0.620071
40.0316	0.625755
40.0318	0.630728
40.0319	0.634281
40.0322	0.642096
40.0323	0.645648
40.0325	0.649911
40.0327	0.655595
40.0329	0.661279
40.0331	0.666963
40.0049	0.671226
40.0051	0.67762
40.0053	0.684725
40.0056	0.69325
40.0059	0.700355
40.0061	0.704618
40.0063	0.711723
40.0065	0.716696
40.0067	0.72167
40.0352	0.726643
40.0354	0.732327
40.0072	0.7373
41.0282	0.741563
41.0284	0.747957
41.0285	0.75222
41.0287	0.757194
41.0289	0.762877
41.0291	0.76714
41.0292	0.771403
41.0294	0.775666
41.0295	0.778508
41.0296	0.78135
41.0299	0.789876
42.0506	0.787034
42.0509	0.79556
42.0511	0.801243
42.0513	0.806927
42.0515	0.812611
42.0518	0.821137
42.052	0.826821
42.0237	0.829663
42.0239	0.835346
43.0163	0.833925
43.0165	0.839609
43.0168	0.846714
43.0454	0.85524
43.0456	0.860924
43.0459	0.868028
43.046	0.872291
43.0746	0.877975
43.0465	0.88508
43.0467	0.890764
43.0185	0.895027
43.0186	0.9
44.0394	0.89929
44.0396	0.904973
44.0399	0.913499
44.0401	0.917762
45.0042	0.919893
45.0045	0.926998
45.0048	0.934813
45.005	0.941918
45.0052	0.947602
45.0056	0.957549
45.0058	0.964654
45.0059	0.967496
46.0268	0.970337
46.9909	0.971758
46.9911	0.977442
48.0119	0.977442
48.0122	0.984547
48.0124	0.990231
50.0257	0.990941
50.026	1
53.9957	1
54.9882	1

## Sheet: Figure 2A
slopes	sorted data		cumulative di								bins' boundaries		bin's midpoints	occurance	Frequency	PDF	CDF
37.1985	21.9001	1	0.00574713					min angle	21.9001		20.6253		21.2627	0	0	0	0
36.0546	23.0255	2	0.0114943					max angle	37.1985		21.9001	1	22.5376	2	0.0114943	0.00901606	0.0114943
35.6027	24.1324	3	0.0172414								23.175	2	23.8124	7	0.0402299	0.0315562	0.0517241				angle	height
34.6057	24.1324	4	0.0229885					Number of bins	12		24.4499	3	25.0873	21	0.12069	0.0946686	0.172414			Rigopiano	32	0.035
35.9045	24.1324	5	0.0287356					bin size	1.27486		25.7247	4	26.3622	24	0.137931	0.108193	0.310345			WH Chandan	31	0.025
35.9796	24.1324	6	0.0344828								26.9996	5	27.637	21	0.12069	0.0946686	0.431034			Drass	33	0.063
33.9406	24.2754	7	0.0402299					number of slopes	174		28.2744	6	28.9119	25	0.143678	0.112701	0.574713
32.6192	24.3705	8	0.045977					counted	174		29.5493	7	30.1867	13	0.0747126	0.0586044	0.649425
33.1044	24.418	9	0.0517241					tot cumul prob	1		30.8242	8	31.4616	22	0.126437	0.0991767	0.775862
33.8616	24.5604	10	0.0574713								32.099	9	32.7365	27	0.155172	0.121717	0.931034
31.9229	24.5604	11	0.0632184								33.3739	10	34.0113	5	0.0287356	0.0225402	0.95977
31.5083	24.6078	12	0.0689655								34.6488	11	35.2862	4	0.0229885	0.0180321	0.982759
32.2519	24.7497	13	0.0747126								35.9236	12	36.5611	3	0.0172414	0.0135241	1
32.5379	24.7969	14	0.0804598								37.1985	13	37.8359	0	0	0	1
32.741	24.8913	15	0.0862069								38.4734	14	39.1108	0	0	0	1
32.6192	24.9855	16	0.091954								39.7482	15	40.3857	0	0	0	1
31.2159	24.9855	17	0.0977011								41.0231	16	41.6605	0	0	0	1
31.5915	24.9855	18	0.103448								42.298	17	42.9354	0	0	0	1
31.9229	25.0326	19	0.109195								43.5728	18	44.2103	0	0	0	1
31.9229	25.2673	20	0.114943								44.8477	19	45.4851	0	0	0	1
31.9229	25.4077	21	0.12069								46.1225	20	46.76	0	0	0	1
32.741	25.4077	22	0.126437								47.3974	21
31.9229	25.4077	23	0.132184
31.7989	25.4077	24	0.137931
30.3276	25.4544	25	0.143678
28.5904	25.5944	26	0.149425
25.0326	25.5944	27	0.155172
28.4134	25.5944	28	0.16092
30.0279	25.641	29	0.166667
31.4666	25.6876	30	0.172414
34.1373	25.7341	31	0.178161
31.6331	25.827	32	0.183908
29.2052	26.0124	33	0.189655
27.4744	26.0124	34	0.195402
27.067	26.0124	35	0.201149
27.4744	26.1049	36	0.206897
26.4274	26.1049	37	0.212644
28.369	26.1049	38	0.218391
28.5904	26.151	39	0.224138
28.1468	26.151	40	0.229885
28.7227	26.151	41	0.235632
28.4577	26.151	42	0.241379
32.2929	26.2433	43	0.247126
33.3049	26.2894	44	0.252874
32.7005	26.3354	45	0.258621
33.2649	26.4274	46	0.264368
33.1847	26.4733	47	0.270115
33.1847	26.5192	48	0.275862
32.1288	26.6109	49	0.281609
33.1445	26.6109	50	0.287356
32.1699	26.7024	51	0.293103
32.2929	26.7481	52	0.298851
32.4155	26.7481	53	0.304598
33.1445	26.885	54	0.310345
32.4155	27.067	55	0.316092
33.2649	27.067	56	0.321839
32.2929	27.067	57	0.327586
29.0741	27.2485	58	0.333333
26.885	27.2485	59	0.33908
29.8127	27.2485	60	0.344828
30.7526	27.4293	61	0.350575
31.09	27.4293	62	0.356322
29.8558	27.4744	63	0.362069
31.9642	27.4744	64	0.367816
28.8108	27.4744	65	0.373563
28.8108	27.4744	66	0.37931
24.8913	27.5195	67	0.385057
26.151	27.6995	68	0.390805
24.2754	27.6995	69	0.396552
24.7497	27.6995	70	0.402299
26.2894	27.8788	71	0.408046
23.0255	27.8788	72	0.413793
21.9001	27.9236	73	0.41954
27.6995	28.0576	74	0.425287
31.3832	28.1468	75	0.431034
33.2248	28.2803	76	0.436782
32.2519	28.3247	77	0.442529
35.0305	28.369	78	0.448276
33.8616	28.4134	79	0.454023
32.741	28.4577	80	0.45977
33.2248	28.4577	81	0.465517
30.0279	28.502	82	0.471264
29.5099	28.5904	83	0.477011
31.3832	28.5904	84	0.482759
31.09	28.5904	85	0.488506
31.4249	28.6345	86	0.494253
30.1994	28.6345	87	0.5
29.9419	28.6345	88	0.505747
26.151	28.6345	89	0.511494
28.502	28.7227	90	0.517241
27.8788	28.7668	91	0.522989
28.5904	28.8108	92	0.528736
26.151	28.8108	93	0.534483
28.6345	29.0741	94	0.54023
26.151	29.0741	95	0.545977
27.5195	29.0741	96	0.551724
25.7341	29.0741	97	0.557471
29.0741	29.2052	98	0.563218
25.6876	29.336	99	0.568966
25.4544	29.5099	100	0.574713
26.3354	29.5966	101	0.58046
26.1049	29.8127	102	0.586207
26.2433	29.8127	103	0.591954
26.0124	29.8558	104	0.597701
28.0576	29.8989	105	0.603448
24.3705	29.9419	106	0.609195
35.1455	30.0279	107	0.614943
31.09	30.0279	108	0.62069
31.8816	30.1994	109	0.626437
32.0877	30.3276	110	0.632184
30.3703	30.3703	111	0.637931
29.8127	30.6255	112	0.643678
30.6255	30.7526	113	0.649425
29.336	31.09	114	0.655172
29.8989	31.09	115	0.66092
28.7668	31.09	116	0.666667
27.9236	31.2159	117	0.672414
28.6345	31.3832	118	0.678161
31.5083	31.3832	119	0.683908
28.2803	31.4249	120	0.689655
26.7481	31.4666	121	0.695402
27.2485	31.4666	122	0.701149
29.0741	31.5083	123	0.706897
27.4744	31.5083	124	0.712644
27.4293	31.5915	125	0.718391
27.4744	31.6331	126	0.724138
25.2673	31.7989	127	0.729885
25.641	31.8816	128	0.735632
27.067	31.9229	129	0.741379
27.8788	31.9229	130	0.747126
24.6078	31.9229	131	0.752874
25.5944	31.9229	132	0.758621
25.827	31.9229	133	0.764368
26.0124	31.9642	134	0.770115
25.4077	32.0877	135	0.775862
26.1049	32.1288	136	0.781609
26.7024	32.1699	137	0.787356
27.6995	32.2519	138	0.793103
28.6345	32.2519	139	0.798851
29.0741	32.2929	140	0.804598
32.6192	32.2929	141	0.810345
31.4666	32.2929	142	0.816092
29.5966	32.4155	143	0.821839
28.6345	32.4155	144	0.827586
28.3247	32.5379	145	0.833333
27.6995	32.6192	146	0.83908
28.4577	32.6192	147	0.844828
26.1049	32.6192	148	0.850575
26.5192	32.7005	149	0.856322
27.067	32.741	150	0.862069
25.4077	32.741	151	0.867816
25.5944	32.741	152	0.873563
25.5944	33.1044	153	0.87931
24.5604	33.1445	154	0.885057
24.1324	33.1445	155	0.890805
24.5604	33.1847	156	0.896552
24.1324	33.1847	157	0.902299
24.418	33.2248	158	0.908046
24.9855	33.2248	159	0.913793
26.7481	33.2649	160	0.91954
27.2485	33.2649	161	0.925287
26.6109	33.3049	162	0.931034
27.2485	33.8616	163	0.936782
27.4293	33.8616	164	0.942529
26.4733	33.9406	165	0.948276
26.6109	34.1373	166	0.954023
26.0124	34.6057	167	0.95977
24.9855	35.0305	168	0.965517
25.4077	35.1455	169	0.971264
25.4077	35.6027	170	0.977011
24.7969	35.9045	171	0.982759
24.1324	35.9796	172	0.988506
24.1324	36.0546	173	0.994253
24.9855	37.1985	174	1
