# Supplementary material for: The mechanism of delayed release in earthquake-induced avalanches
Source: Proc Math Phys Eng Sci. 2019 Jul 24;475(2227):20190092. doi: 10.1098/rspa.2019.0092 (PMC6694300; doi:10.1098/rspa.2019.0092)
Supplement: Data in Fig3A [file rspa20190092supp7.xlsx]

## Sheet: Kirchner et al 2001
Strain rate	Peak shear stress
[s-1]	[kPa]
1.67e-06	24.5276
1.82e-06	22.8164
3.34e-06	23.672
3.3e-06	29.0909
3.48e-06	27.6649
8.47e-06	30.5169
8.95e-06	31.6578
8.83e-06	33.369
2.57e-05	36.221
2.53e-05	38.7879
2.53e-05	41.9251
5.51e-05	40.2139
5.58e-05	53.0481
5.51e-05	55.3298
0.000109	36.5062
0.000107	19.1087
0.000104	17.1123
0.000116	17.6827
0.000211	17.9679
0.000211	27.6649
0.000209	30.8021
0.000423	27.3797
0.000417	21.9608
0.000412	19.9643
0.000417	11.4082
0.0011	7.70053
0.00115	11.123
0.00113	13.4046
0.00113	23.672
0.00348	14.2602
0.00344	10.5526
0.00344	7.41533
0.00379	9.41176
