# Supplementary material for: The mechanism of delayed release in earthquake-induced avalanches
Source: Proc Math Phys Eng Sci. 2019 Jul 24;475(2227):20190092. doi: 10.1098/rspa.2019.0092 (PMC6694300; doi:10.1098/rspa.2019.0092)
Supplement: Data in Fig6A [file rspa20190092supp9.xlsx]

## Sheet: Figure 6A
k	0.1	0.2	0.3
t_bar	r	r	r
0	1	1	1
1	1.10517	1.2214	1.34986
2	1.2214	1.49182	1.82212
3	1.34986	1.82212	2.4596
4	1.49182	2.22554	3.32012
5	1.64872	2.71828	4.48169
6	1.82212	3.32012	6.04965
7	2.01375	4.0552	8.16617
8	2.22554	4.95303	11.0232
9	2.4596	6.04965	14.8797
10	2.71828	7.38906	20.0855
11	3.00417	9.02501	27.1126
12	3.32012	11.0232	36.5982
13	3.6693	13.4637	49.4024
14	4.0552	16.4446	66.6863
15	4.48169	20.0855	90.0171
16	4.95303	24.5325	121.51
17	5.47395	29.9641	164.022
18	6.04965	36.5982	221.406
19	6.68589	44.7012	298.867
20	7.38906	54.5982	403.429
